# Supplementary material for: Bioactive Phytochemicals from Salix pseudolasiogyne Twigs: Anti-Adipogenic Effect of 2′-O-Acetylsalicortin in 3T3-L1 Cells
Source: MDPI journal article supplement (doi:10.3390/ijms231912006), 2022-10-09
Supplement: s1 [file s1]

## Supplementary data

---

### Bioactive Phytochemicals from *Salix pseudolasiogyne* Twigs: Anti-Adipogenic Effect of 2'-O-Acetylsalicortin in 3T3-L1 Cells

Hee Jung Kim <sup>1,2,†</sup>, Yoon Seo Jang <sup>3,†</sup>, Ji Won Ha <sup>3</sup>, Moon-Jin Ra <sup>4</sup>, Sang-Mi Jung <sup>4</sup>, Jeong-Nam Yu <sup>5</sup>, Kyunga Kim <sup>6</sup>,  
Ki Hyun Kim <sup>3,\*</sup> and Sung Hee Um <sup>1,2,7,\*</sup>

<sup>1</sup> Department of Molecular Cell Biology, Samsung Biomedical Research Institute, School of Medicine, Sungkyunkwan University, Suwon 16419, Korea

<sup>2</sup> Department of Health Sciences and Technology, Samsung Medical Center, Samsung Advanced Institute for Health Sciences and Technology, Sungkyunkwan University, Seoul 06351, Korea

<sup>3</sup> School of Pharmacy, Sungkyunkwan University, Suwon 16419, Korea

<sup>4</sup> Hongcheon Institute of Medicinal Herb, Hongcheon-gun 25142, Korea

<sup>5</sup> Nakdonggang National Institute of Biological Resources, Sangju 37242, Korea

<sup>6</sup> Biomedical Statistics Center, Research Institute for Future Medicine, Samsung Medical Center, Seoul 06351, Korea

<sup>7</sup> Biomedical Institute Convergence, Sungkyunkwan University, Suwon 16419, Korea

\* Correspondence: khkim83@skku.edu (K.H.K.); shum@skku.edu (S.H.U.); Tel.: +82-31-290-7700 (K.H.K.); Tel.: +82-31-299-6123 (S.H.U.)

† These authors contributed equally to this work.

**Figure S1.**  $^1\text{H}$  NMR spectrum of oregonin (**1**) ( $\text{CD}_3\text{OD}$ , 850 MHz)

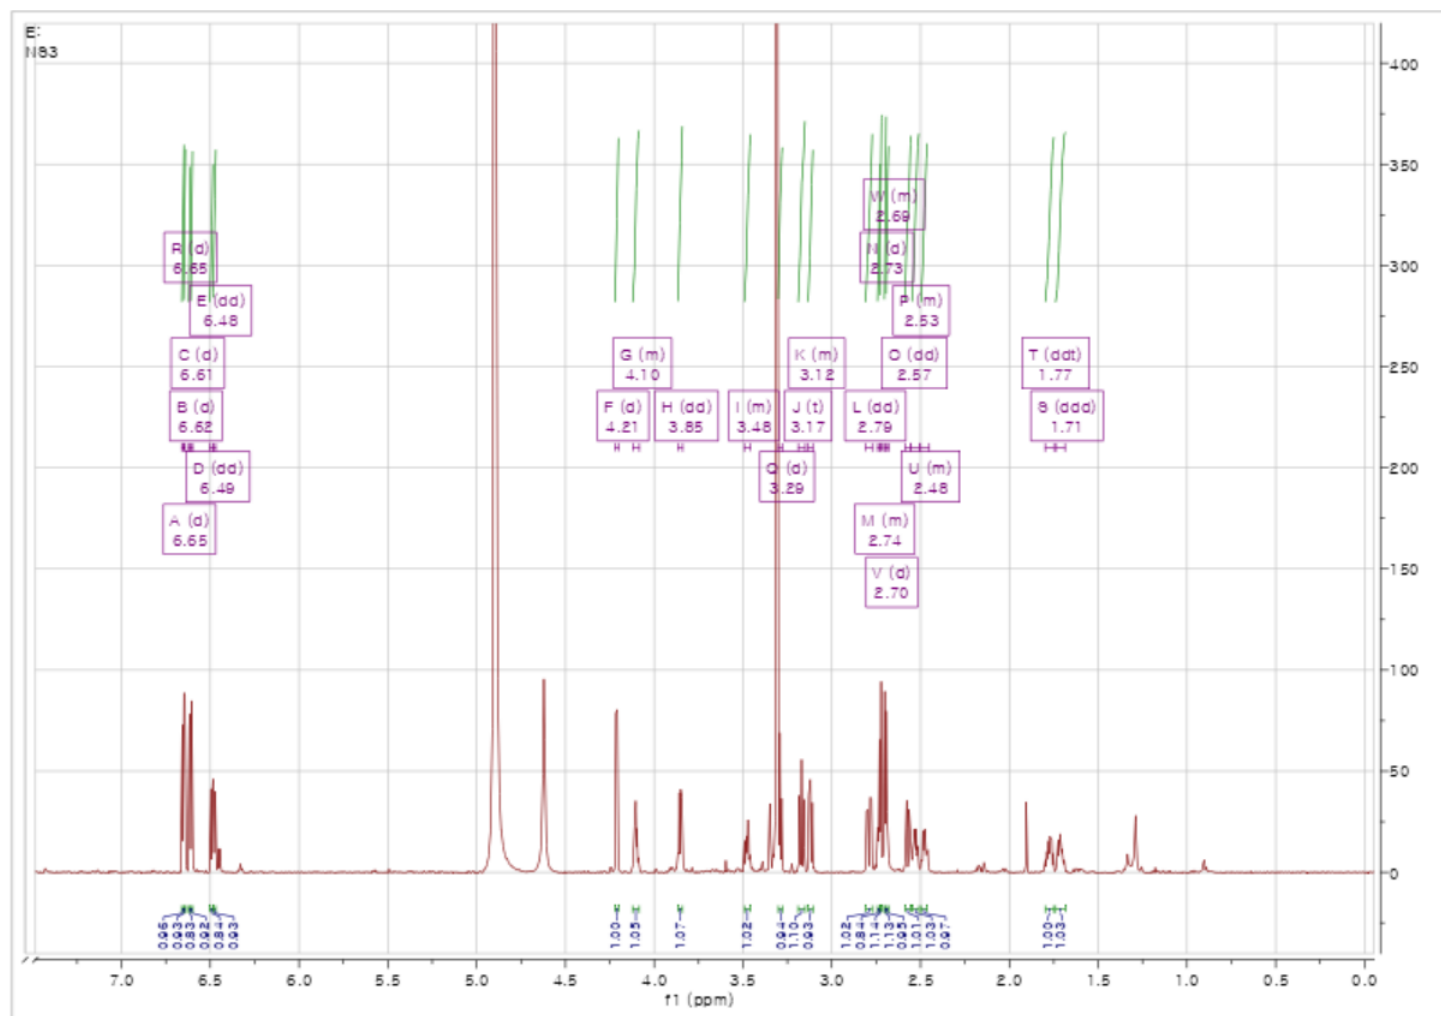

**Figure S2.**  $^1\text{H}$  NMR spectrum of 2'-*O*-acetylsalicortin (**2**) ( $\text{CD}_3\text{OD}$ , 850 MHz)

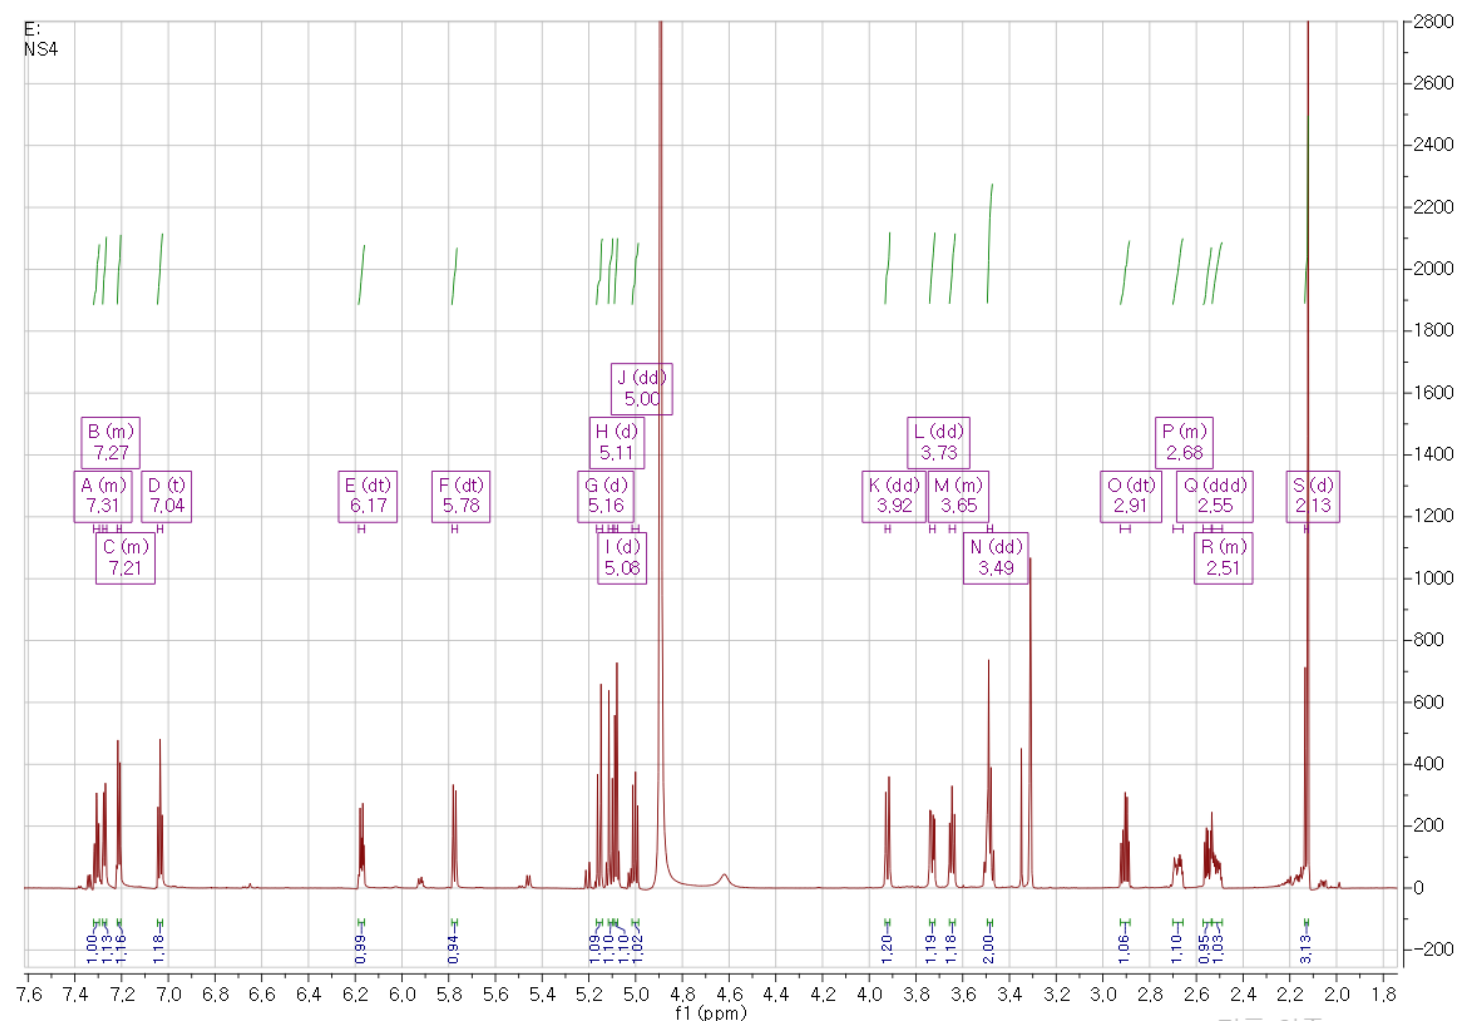

**Figure S3.** HPLC chromatogram of fractions (P1 – P4).

- Column : C18
- Solvent : MeOH Gradient 30~50%
- Sample Wt : 1.0 g

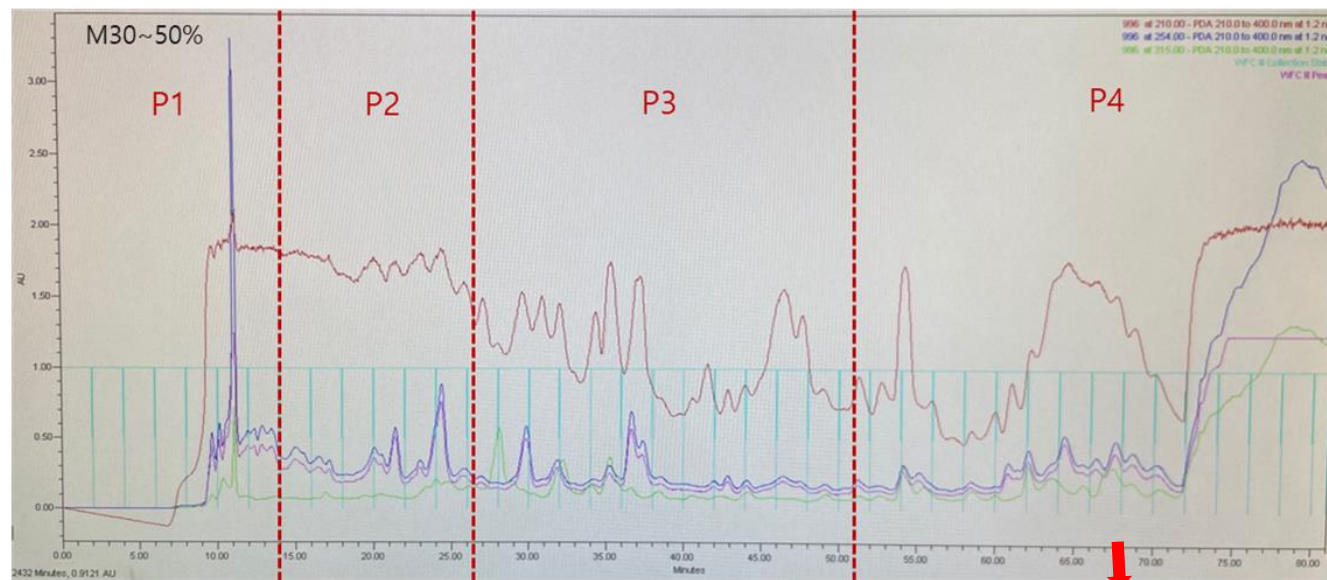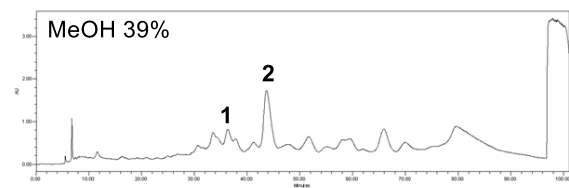

Pure compounds

Compounds 1 and 2
